# Supplementary material for: Variation in Treatment Patterns of Patients with Early-Onset Gastric Cancer
Source: MDPI journal article supplement (doi:10.3390/cancers14153633), 2022-07-26
Supplement: s1 [file s1]

## Supplementary Tables

**Supplementary Table S1.** Treatment Patterns Among Patients with AOGC.

| Variable       | Categories              | Odds Ratio; 95% CI; <i>p</i> Value |                            |                            |
|----------------|-------------------------|------------------------------------|----------------------------|----------------------------|
|                |                         | Surgery                            | Chemotherapy               | Radiation                  |
| Age            | (Continuous)            | 1.01; [1.00, 1.01]; <0.001         | 0.99; [0.98, 0.99]; <0.001 | 1.01; [1.00, 1.01]; <0.001 |
| Gender/Sex     | Female                  | 0.93; [0.90, 0.96]; <0.001         | 0.82; [0.79, 0.84]; <0.001 | 1.42; [1.37, 1.47]; <0.001 |
|                | Male                    | Reference                          |                            |                            |
| Race/Ethnicity | Asian/PI                | 0.80; [0.75, 0.85]; <0.001         | 1.30; [1.23, 1.38]; <0.001 | 0.84; [0.79, 0.89]; <0.001 |
|                | African American        | 1.13; [1.08, 1.18]; <0.001         | 1.04; [1.00, 1.08]; 0.048  | 1.03; [0.98, 1.07]; 0.275  |
|                | Hispanic                | 1.13; [1.07, 1.19]; <0.001         | 1.20; [1.15, 1.26]; <0.001 | 1.01; [0.96, 1.07]; 0.756  |
|                | Non-Hispanic White      | Reference                          |                            |                            |
| Center Type    | Community               | 1.78; [1.68, 1.89]; <0.001         | 0.88; [0.83, 0.93]; <0.001 | 0.83; [0.78, 0.89]; <0.001 |
|                | Comprehensive Community | 1.27; [1.23, 1.32]; <0.001         | 0.96; [0.94, 0.99]; 0.014  | 0.84; [0.81, 0.86]; <0.001 |
|                | Academic                | Reference                          |                            |                            |
| Payor Status   | Uninsured               | 2.12; [1.98, 2.27]; <0.001         | 0.63; [0.59, 0.66]; <0.001 | 1.14; [1.06, 1.22]; <0.001 |
|                | Medicaid                | 1.57; [1.49, 1.65]; <0.001         | 0.76; [0.73, 0.80]; <0.001 | 0.99; [0.94, 1.04]; 0.699  |
|                | Medicare                | 1.25; [1.20, 1.30]; <0.001         | 0.74; [0.71, 0.77]; <0.001 | 1.08; [1.04, 1.12]; <0.001 |
|                | Other Government        | 1.50; [1.34, 1.68]; <0.001         | 0.78; [0.71, 0.87]; <0.001 | 0.64; [0.58, 0.72]; <0.001 |
|                | Unknown                 | 2.01; [1.82, 2.23]; <0.001         | 0.86; [0.78, 0.94]; 0.001  | 1.20; [1.08, 1.34]; <0.001 |
| Location       | Private                 | Reference                          |                            |                            |
|                | Not Metro Adjacent      | 0.94; [0.87, 1.01]; 0.0743         | 1.09; [1.02, 1.17]; 0.012  | 0.87; [0.81, 0.94]; <0.001 |
|                | Metro Adjacent          | 0.92; [0.87, 0.96]; <0.001         | 1.02; [0.97, 1.07]; 0.404  | 0.89; [0.85, 0.94]; <0.001 |
|                | Metro                   | Reference                          |                            |                            |

Selected results are presented in this table. The multivariable logistic regression also controlled for year of diagnosis, primary site, and stage of cancer.

As displayed in Supplementary Table S1, female patients with AOGC were less likely to receive surgery and chemotherapy but more likely to receive radiation compared to male patients with AOGC. Compared to Caucasian patients, Asian/Pacific Islander patients with AOGC were less likely to receive surgery and radiation but more likely to receive chemotherapy. AA patients with AOGC were more likely to receive surgery and chemotherapy. Hispanic patients with AOGC were more likely to receive surgery and chemotherapy. Patients with AOGC treated at community cancer centers were more likely to receive surgery but less likely to receive chemotherapy and radiation than patients with AOGC treated at academic centers. Compared to privately insured patients with AOGC, uninsured patients with AOGC were more likely to receive surgery and radiation but less likely to receive chemotherapy. Patients with AOGC who had Medicaid were more likely to receive surgery but less likely to receive chemotherapy. Patients with AOGC who had Medicare were more likely to receive surgery and radiation but less likely to receive chemotherapy. Patients with AOGC who resided in areas that were not adjacent to metropolitan areas were more likely to receive chemotherapy but less likely to receive radiation compared to patients residing in metropolitan areas.

**Supplementary Table S2.** Treatment Patterns Among Patients with LOGC.

| Variable       | Categories              | Odds Ratio; 95% CI; <i>p</i> Value |                            |                            |
|----------------|-------------------------|------------------------------------|----------------------------|----------------------------|
|                |                         | Surgery                            | Chemotherapy               | Radiation                  |
| Age            | (Continuous)            | 1.11; [1.11, 1.11]; <0.001         | 0.90; [0.90, 0.90]; <0.001 | 1.03; [1.02, 1.03]; <0.001 |
| Gender/Sex     | Female                  | 1.03; [1.00, 1.06]; 0.079          | 0.76; [0.73, 0.78]; <0.001 | 1.41; [1.35, 1.46]; <0.001 |
|                | Male                    | Reference)                         |                            |                            |
| Race/Ethnicity | Asian/PI                | 0.80; [0.75, 0.85]; <0.001         | 0.99; [0.93, 1.05]; 0.686  | 0.92; [0.85, 1.00]; 0.037  |
|                | African American        | 1.33; [1.27, 1.39]; <0.001         | 0.92; [0.88, 0.97]; <0.001 | 0.98; [0.92, 1.04]; 0.440  |
|                | Hispanic                | 1.00; [0.94, 1.06]; 0.927          | 0.96; [0.91, 1.02]; 0.239  | 1.18; [1.09, 1.27]; <0.001 |
|                | Non-Hispanic White      | Reference                          |                            |                            |
| Center Type    | Community               | 1.79; [1.69, 1.90]; <0.001         | 0.87; [0.82, 0.92]; <0.001 | 0.80; [0.75, 0.85]; <0.001 |
|                | Comprehensive Community | 1.29; [1.25, 1.33]; <0.001         | 0.92; [0.89, 0.95]; <0.001 | 0.87; [0.84, 0.90]; <0.001 |
|                | Academic                | Reference                          |                            |                            |
| Payor Status   | Uninsured               | 2.26; [1.90, 2.70]; <0.001         | 0.62; [0.53, 0.74]; <0.001 | 1.16; [0.93, 1.44]; 0.190  |
|                | Medicaid                | 1.32; [1.18, 1.47]; <0.001         | 0.76; [0.68, 0.85]; <0.001 | 1.24; [1.08, 1.43]; 0.003  |
|                | Medicare                | 1.03; [0.97, 1.08]; 0.334          | 0.94; [0.89, 0.99]; 0.016  | 1.07; [1.01, 1.13]; 0.032  |
|                | Other Government        | 1.36; [1.14, 1.61]; <0.001         | 0.86; [0.72, 1.02]; 0.080  | 0.64; [0.54, 0.77]; <0.001 |
|                | Unknown                 | 1.44; [1.26, 1.65]; <0.001         | 1.05; [0.93, 1.20]; 0.432  | 1.12; [0.96, 1.31]; 0.155  |
|                | Private                 | Reference                          |                            |                            |
| Location       | Not Metro Adjacent      | 0.90; [0.83, 0.98]; 0.011          | 1.02; [0.94, 1.10]; 0.668  | 0.97; [0.89, 1.06]; 0.498  |
|                | Metro Adjacent          | 0.91; [0.86, 0.96]; <0.001         | 0.95; [0.90, 1.00]; 0.039  | 0.96; [0.90, 1.02]; 0.150  |
|                | Metro                   | Reference                          |                            |                            |

Selected results are presented in this table. The multivariable logistic regression also controlled for year of diagnosis, primary site, and stage of cancer.

As displayed in Supplementary Table S2, female patients with LOGC were less likely to receive chemotherapy but more likely to receive radiation compared to male patients with LOGC. Compared to Caucasian patients, Asian/Pacific Islander patients with LOGC were less likely to receive surgery and radiation. AA patients with LOGC were more likely to receive surgery but less likely to receive chemotherapy. Hispanic patients with LOGC were more likely to receive radiation. Patients with LOGC treated at community cancer centers were more likely to receive surgery but less likely to receive chemotherapy and radiation than patients with LOGC treated at academic centers. Compared to privately insured patients with LOGC, uninsured patients with LOGC were more likely to receive surgery and less likely to receive chemotherapy. Patients with LOGC who had Medicaid were more likely to receive surgery and radiation but less likely to receive chemotherapy. Patients with LOGC who had Medicare were more likely to receive surgery and radiation but less likely to receive chemotherapy. Patients with LOGC who resided in areas that were not adjacent to metropolitan areas were less likely to receive surgery compared to patients residing in metropolitan areas.
